# Supplementary material
Source: HighWire-hosted journal article supplement (https://jitc.bmj.com/content/10/7/e004668)

### Online-Only Supplements

1. **Supplement 1:** Details on 1<sup>st</sup> exposure CPI combination approaches. TVEC Talimogene laherparepvec.
2. **Supplement 2:** Additional details of patient and disease characteristics at 1<sup>st</sup> exposure to CPI. CR complete response, ECOG Eastern Cooperative Oncology Group, LDH lactate dehydrogenase.
3. **Supplement 3:** Progression Free Survival (PFS) by best overall RECIST response.
  - a. **Supplement 3a:** Progression Free Survival (PFS) for patients who responded to 1<sup>st</sup> exposure CPI.
  - b. **Supplement 3b:** Progression Free Survival (PFS) for patients who responded to 1<sup>st</sup> exposure CPI, by best RECIST response.
  - c. **Supplement 3c:** Progression Free Survival (PFS) for patients who responded to 1<sup>st</sup> exposure CPI, by treatment received.
  - d. **Supplement 3d:** Progression Free Survival (PFS) for patients achieving CR to 1<sup>st</sup> exposure CPI, by treatment received.
  - e. **Supplement 3e:** Progression Free Survival (PFS) for patients achieving PR to 1<sup>st</sup> exposure CPI, by treatment received.
4. **Supplement 4:** Objective response rate (ORR) to second line therapy, immediately subsequent to 1<sup>st</sup> CPI exposure. CR complete response; PR partial response; SD stable disease; PD progressive disease.
5. **Supplement 5:** Univariable and Multivariable Cox regression for overall survival (OS) to 1<sup>st</sup> exposure CPI. HR hazard ratio; CPI checkpoint inhibitor; LDH lactate dehydrogenase; ECOG Eastern Cooperative Oncology Group.
6. **Supplement 6:** Patient and disease characteristics by primary acral melanoma site.
7. **Supplement 7:** Objective response rate (ORR) to 1<sup>st</sup> exposure CPI, by primary site. CR complete response; PR partial response; SD stable disease; PD progressive disease; OR odds ratio.

8. **Supplement 8:** Patient and disease characteristics for patients treated with 1<sup>st</sup> line CPI therapy. ECOG Eastern Cooperative Oncology Group; LDH lactate dehydrogenase.
9. **Supplement 9:** Efficacy of 1<sup>st</sup> line CPI therapy.
  - a. **Supplement 9a:** Objective response rate (ORR) to 1<sup>st</sup> line CPI therapy. CR complete response; PR partial response; SD stable disease; PD progressive disease.
  - b. **Supplement 9b:** Univariable and Multivariable Logistic regression for objective response rate (ORR) to 1<sup>st</sup> line CPI therapy, excluding 69 patients who received first line non-CPI therapy. OR odds ratio; CPI checkpoint inhibitor; LDH lactate dehydrogenase; ECOG Eastern Cooperative Oncology Group.
10. **Supplement 10:** Progression free survival (PFS) and overall survival (OS) the 1<sup>st</sup> line CPI therapy.
  - a. **Supplement 10a:** Kaplan-Meier curve for progression free survival (PFS) to 1<sup>st</sup> line CPI therapy (p=0.017).
  - b. **Supplement 10b:** Univariable and Multivariable Cox regression for progression free survival (PFS) to 1<sup>st</sup> line CPI therapy. HR hazard ratio; CPI checkpoint inhibitor; LDH lactate dehydrogenase; ECOG Eastern Cooperative Oncology Group.
  - c. **Supplement 10c:** Kaplan-Meier curve for overall survival (OS) to 1<sup>st</sup> line CPI therapy (p=0.68).
  - d. **Supplement 10d:** Univariable and Multivariable Cox regression for overall survival (OS) to 1<sup>st</sup> line CPI therapy. HR hazard ratio; CPI checkpoint inhibitor; LDH lactate dehydrogenase; ECOG Eastern Cooperative Oncology Group.
11. **Supplement 11:** Patient and disease characteristics of total population, and by 1<sup>st</sup> CPI exposure (anti-PD1 vs anti-PD1/ipilimumab), before and after propensity score matching.
12. **Supplement 12:**1 Univariate Logistic regression of objective response rate (ORR), after propensity score matching.

13. **Supplement 13:** Progression free survival (PFS), after propensity score matching.

14. **Supplement 14:** Overall survival (OS), after propensity score matching.

15. **Supplement 15:** BRAF mutant subgroup.

- a. **Supplement 15a:** Objective response rate (ORR) to 1<sup>st</sup> line CPI or BRAF/MEK inhibitor therapy in BRAF mutant patients (N=38)
- b. **Supplement 15b:** Univariable logistic regression for objective response rate (ORR) to first line CPI or targeted therapy in BRAF mutation patients (N=38)
- c. **Supplement 15c:** Kaplan-Meier curve for progression free survival (PFS) in BRAF mutant patients (N=38)
- d. **Supplement 15d:** Kaplan-Meier curve for overall survival (OS) in BRAF mutant patients (N=38)

**Supplement 1:** Details on 1<sup>st</sup> exposure CPI combination approaches. TVEC Talimogene laherparepvec.

| 1 <sup>st</sup> exposure CPI category | Combination agents                  | Patient number (N) |
|---------------------------------------|-------------------------------------|--------------------|
| PD1 +/- Other                         | Pembrolizumab + Electrochemotherapy | 1                  |
|                                       | Pembrolizumab + Epacadostat         | 6                  |
|                                       | Pembrolizumab + Imatinib            | 1                  |
|                                       | Pembrolizumab + IDO inhibitor       | 2                  |
|                                       | Pembrolizumab + TVEC                | 7                  |
|                                       | Nivolumab + Bempegaldesleukin       | 1                  |
|                                       | Pembrolizumab + Interleukin         | 1                  |
|                                       | Pembrolizumab + Lenvatinib          | 1                  |
| CTLA4 +/- Other                       | Ipilimumab + TVEC                   | 2                  |
|                                       | Ipilimumab + Bevacizumab            | 1                  |

**Supplement 2:** Additional details of patient and disease characteristics at 1<sup>st</sup> exposure to CPI. CR complete response, ECOG Eastern Cooperative Oncology Group, LDH lactate dehydrogenase.

| Patient and Disease Characteristic                               | Total (N=325) | Anti-PD1 (N=184) | Anti-PD1 + Ipilimumab<br>(N=59) | Ipilimumab<br>(N=82) | P-<br>value <sup>a</sup> |
|------------------------------------------------------------------|---------------|------------------|---------------------------------|----------------------|--------------------------|
| Median age at diagnosis of primary acral melanoma, years [range] | 63 [20-88]    | 65 [29-88]       | 60 [20-81]                      | 59 [28-80]           | <b>0.001</b>             |
| Mutation- positive/tested (% of tested)                          |               |                  |                                 |                      | 0.07                     |
| BRAF                                                             | 38/312 (12)   | 21/179 (12)      | 10/55 (18)                      | 7/78 (9)             |                          |
| V600E                                                            | 29            | 13               | 9                               | 7                    |                          |
| V600                                                             | 2             | 2                | -                               | -                    |                          |
| Other                                                            | 4             | 3                | 1                               | -                    |                          |
| Unknown                                                          | 3             | 3                | -                               | -                    |                          |
| KIT                                                              | 23/235 (10)   | 19/140 (14)      | 1/45 (2)                        | 3/50 (6)             |                          |
| NRAS                                                             | 54/264 (21)   | 29/153 (19)      | 11/49 (22)                      | 14/62 (23)           |                          |
| Q61R                                                             | 20            | 12               | 4                               | 4                    |                          |
| Q61K                                                             | 8             | 5                | 1                               | 2                    |                          |

|                                         |              |             |            |            |                   |
|-----------------------------------------|--------------|-------------|------------|------------|-------------------|
| G12C/D/K/R/S                            | 6            | 1           | 2          | 3          |                   |
| Other                                   | 4            | 1           | 2          | 1          |                   |
| Unknown                                 | 16           | 10          | 2          | 4          |                   |
| BRAF/KIT both                           | 1/234 (0.4)  | 1/139 (0.7) | 0          | 0          |                   |
| Other                                   | 23/93 (25)   | 14/56 (25)  | 7/26 (27)  | 2/11 (18)  |                   |
| Wild Type                               | 175/314 (56) | 96/180 (53) | 26/55 (47) | 53/78 (67) |                   |
| Unknown/Not tested                      | 11/325 (3)   | 4           | 4          | 3          |                   |
| <b>Treatment discontinuation reason</b> |              |             |            |            | <b>&lt;0.0001</b> |
| Progressive Disease                     | 197 (61)     | 126 (69)    | 32 (54)    | 39 (48)    |                   |
| Toxicity                                | 46 (14)      | 17 (9)      | 22 (37)    | 7 (9)      |                   |
| Complete Response                       | 19 (6)       | 14 (8)      | 1 (2)      | 4 (5)      |                   |
| Completed therapy                       | 36 (11)      | 7 (4)       | 0          | 29 (35)    |                   |
| Elective                                | 7 (2)        | 3 (2)       | 2 (3)      | 2 (2)      |                   |
| Other <sup>b</sup>                      | 9 (3)        | 7 (4)       | 1 (2)      | 1 (1)      |                   |
| Treatment ongoing                       | 11 (3)       | 10 (5)      | 1 (2)      | 0          |                   |

<sup>a</sup>Pearson's Chi-squared test; Fisher's exact test. <sup>b</sup>Other includes death, other medical condition.

**Supplement 3:** Progression Free Survival (PFS) by best overall RECIST response.

**Supplement 3a:** Progression Free Survival (PFS) for patients who responded to 1<sup>st</sup> exposure CPI.

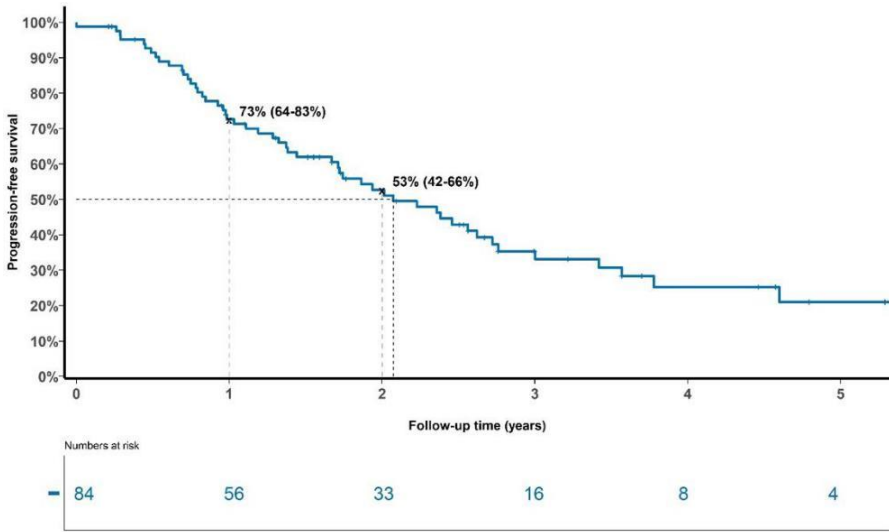

**Supplement 3b:** Progression Free Survival (PFS) for patients who responded to 1<sup>st</sup> exposure CPI, by best RECIST response.

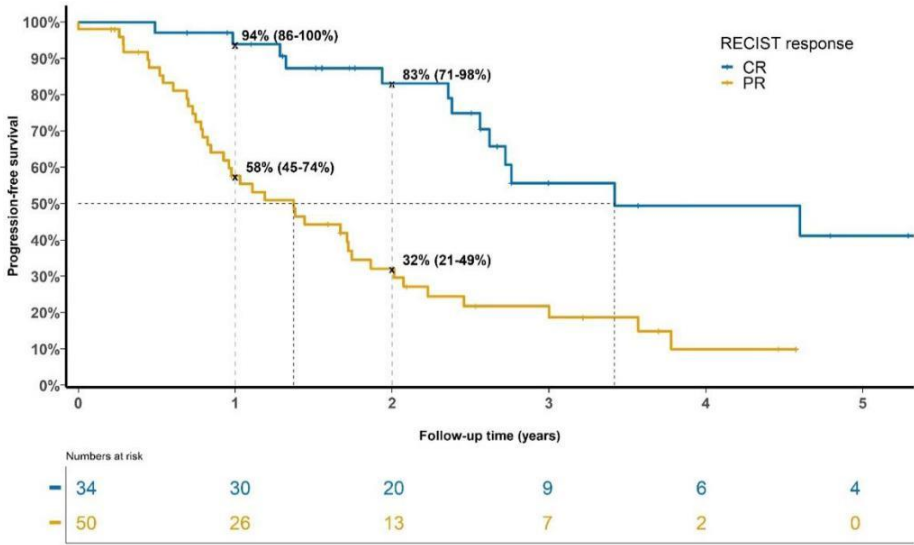



**Supplement 3c:** Progression Free Survival (PFS) for patients who responded to 1<sup>st</sup> exposure CPI, by treatment received.

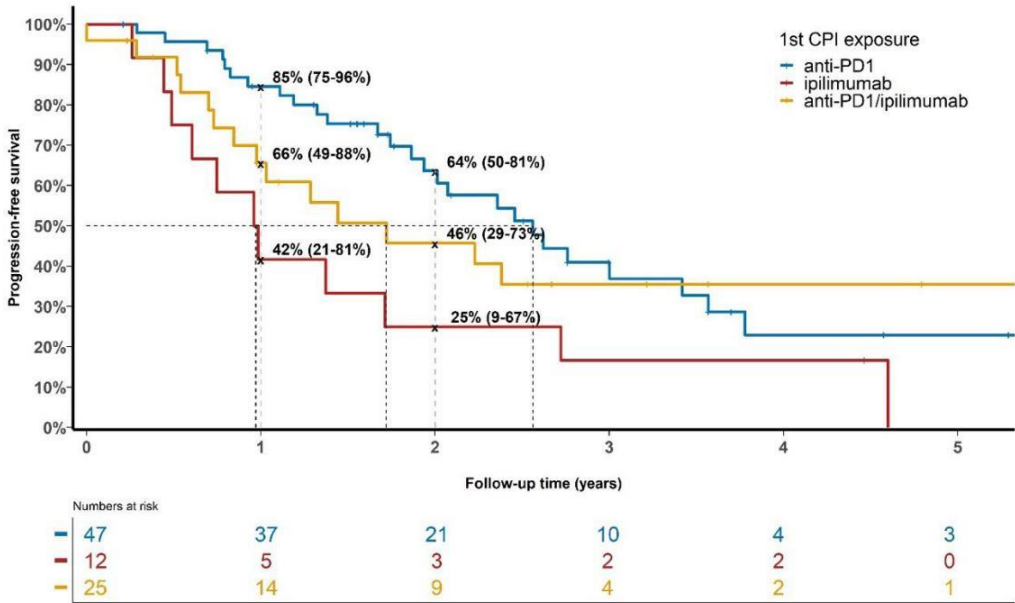

**Supplement 3d:** Progression Free Survival (PFS) for patients achieving CR to 1<sup>st</sup> exposure CPI, by treatment received.

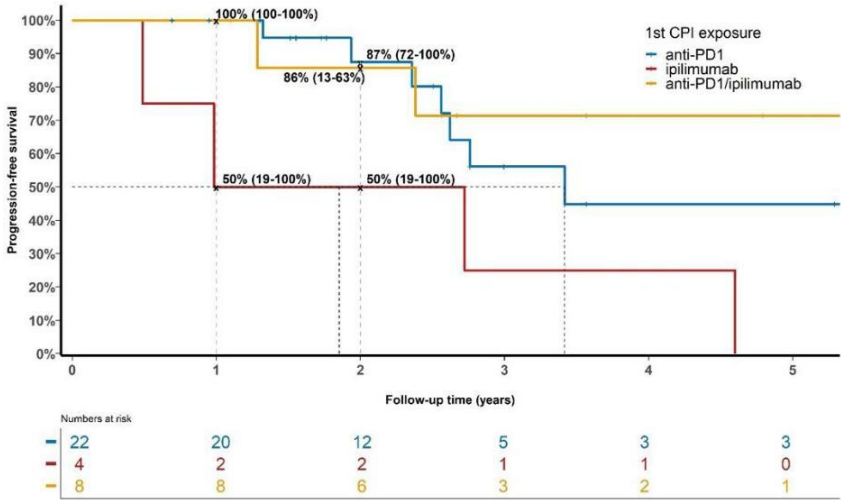

**Supplement 3e:** Progression Free Survival (PFS) for patients achieving PR to 1<sup>st</sup> exposure CPI, by treatment received.

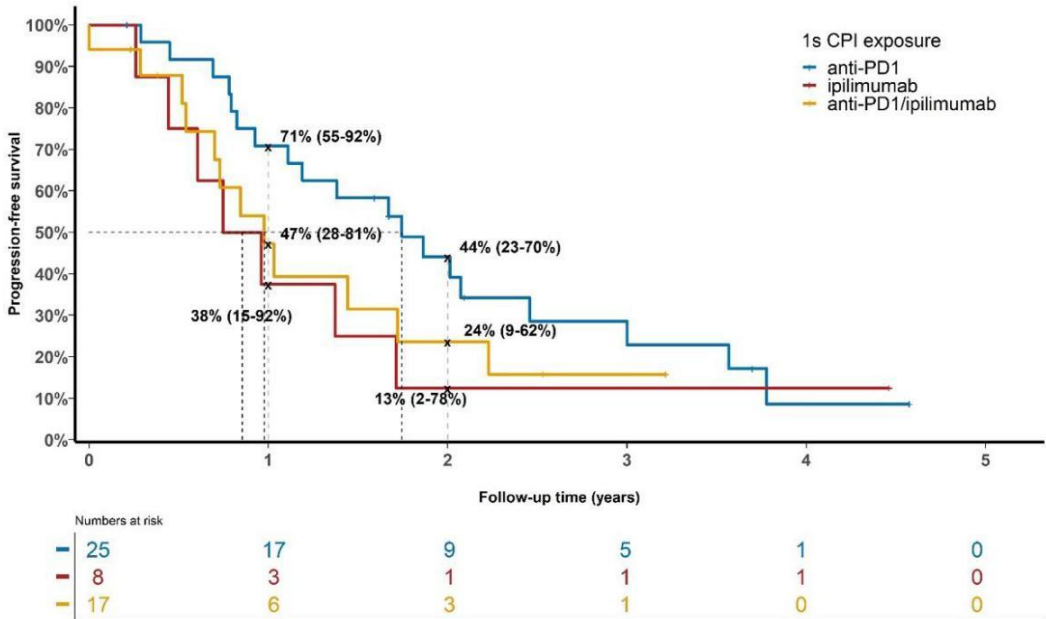

**Supplement 4:** Objective response rate (ORR) to second line therapy, immediately subsequent to 1<sup>st</sup> CPI exposure. CR complete response; PR partial response; SD stable disease; PD progressive disease.

| N (%)  | 1 <sup>st</sup> exposure anti-PD1 → anti-PD1 + ipilimumab (N=21) | 1 <sup>st</sup> exposure anti-PD1 → ipilimumab (N=37) | 1 <sup>st</sup> exposure anti-PD1 → BRAF/MEK (N=8) | 1 <sup>st</sup> exposure anti-PD1 + ipilimumab → BRAF/MEK (N=3) |
|--------|------------------------------------------------------------------|-------------------------------------------------------|----------------------------------------------------|-----------------------------------------------------------------|
| ORR, % | 24                                                               | 14                                                    | 75                                                 | 67                                                              |
| CR     | 2 (10)                                                           | 1 (3)                                                 | 3 (38)                                             | 1 (33)                                                          |
| PR     | 3 (14)                                                           | 4 (11)                                                | 3 (38)                                             | 1 (33)                                                          |
| SD     | 3 (14)                                                           | 11 (30)                                               | 1 (13)                                             | 0 (0)                                                           |
| PD     | 13 (62)                                                          | 21 (57)                                               | 1 (13)                                             | 1 (33)                                                          |

**Supplement 5:** Univariable and Multivariable Cox regression for overall survival (OS) to 1<sup>st</sup> exposure CPI. HR hazard ratio; CPI checkpoint inhibitor; LDH lactate dehydrogenase; ECOG Eastern Cooperative Oncology Group.

| Univariable                        |                    |              | Multivariable     |             |
|------------------------------------|--------------------|--------------|-------------------|-------------|
| Variable                           | HR (95% CI)        | P-value      | HR (95% CI)       | P-value     |
| <b>1<sup>st</sup> CPI exposure</b> |                    |              |                   |             |
| Anti-PD1                           | 1                  |              |                   |             |
| Anti-PD1/ipilimumab                | 1.30 (0.90, 1.87)  | 0.16         | -                 | -           |
| Ipilimumab                         | 1.11 (0.82, 1.52)  | 0.50         | -                 | -           |
| <b>Stage of advanced disease</b>   |                    |              |                   |             |
| Unresectable IIIB                  | 1                  |              | 1                 |             |
| Unresectable IIIC                  | 0.57 (0.22, 1.48)  | 0.25         | 0.48 (0.18, 1.25) | 0.13        |
| Unresectable IIID                  | 0.69 (0.23, 2.07)  | 0.51         | 0.61 (0.20, 1.88) | 0.39        |
| M1a                                | 0.68 (0.26, 1.75)  | 0.42         | 0.68 (0.26, 1.79) | 0.44        |
| M1b                                | 0.90 (0.36, 2.26)  | 0.82         | 0.76 (0.30, 1.96) | 0.58        |
| M1c                                | 1.02 (0.41, 2.52)  | 0.97         | 0.84 (0.33, 2.10) | 0.71        |
| M1d                                | 4.49 (1.71, 11.83) | <b>0.002</b> | 2.96 (1.07, 8.23) | <b>0.04</b> |
| <b>Primary acral melanoma site</b> |                    |              |                   |             |

|                  |                   |                   |                   |               |
|------------------|-------------------|-------------------|-------------------|---------------|
| Subungual        | 1                 |                   |                   |               |
| Plantar          | 0.86 (0.63, 1.18) | 0.35              | -                 | -             |
| Palmar           | 0.58 (0.30, 1.12) | 0.11              | -                 | -             |
| Sex              |                   |                   |                   |               |
| Female           | 1                 |                   |                   |               |
| Male             | 1.13 (0.86, 1.48) | 0.39              | -                 | -             |
| Ethnicity        |                   |                   |                   |               |
| Non-Caucasian    | 1                 |                   |                   |               |
| Caucasian        | 0.97 (0.69, 1.36) | 0.85              | -                 | -             |
| LDH <sup>a</sup> |                   |                   |                   |               |
| Normal (≤ULN)    | 1                 |                   |                   |               |
| Elevated (>ULN)  | 1.45 (1.02, 2.05) | <b>0.04</b>       | -                 | -             |
| ECOG             |                   |                   |                   |               |
| 0                | 1                 |                   | 1                 |               |
| ≥1               | 2.11 (1.57, 2.84) | <b>&lt;0.0001</b> | 1.75 (1.27, 2.42) | <b>0.0006</b> |

<sup>a</sup>LDH not included in multivariable analysis due to >20% missing values.

**Supplement 6:** Patient and disease characteristics by primary acral melanoma site.

| Patient Characteristic                                                   | Total<br>(N=325) | Palmar<br>(N=22) | Plantar<br>(N=234) | Subungual<br>(N=69) | P-value <sup>a</sup> |
|--------------------------------------------------------------------------|------------------|------------------|--------------------|---------------------|----------------------|
| <b>Median age at diagnosis of advanced acral melanoma, years [range]</b> | 66 [23- 90]      | 59 [32-77]       | 67 [23- 90]        | 67 [31- 89]         | <b>0.04</b>          |
| <b>Sex- no. (%)</b>                                                      |                  |                  |                    |                     | 0.67                 |
| Female                                                                   | 154 (47)         | 10 (46)          | 108 (46)           | 36 (52)             |                      |
| Male                                                                     | 171 (53)         | 12 (55)          | 126 (54)           | 33 (48)             |                      |
| <b>Ethnicity- no. (%)</b>                                                |                  |                  |                    |                     | 0.97                 |
| Caucasian                                                                | 252 (78)         | 17 (77)          | 183 (78)           | 52 (75)             |                      |
| Non-Caucasian <sup>b</sup>                                               | 64 (20)          | 4 (18)           | 46 (20)            | 14 (20)             |                      |
| Unknown                                                                  | 9 (3)            | 1 (5)            | 5 (2)              | 3 (4)               |                      |
| <b>Mutation- positive/tested (% of tested)</b>                           |                  |                  |                    |                     | <b>0.0004</b>        |
| BRAF                                                                     | 38/312 (12)      | 2/20 (10)        | 32/227 (14)        | 4/65 (6)            |                      |
| V600E                                                                    | 29               | 2                | 25                 | 2                   |                      |

|                      |              |            |              |            |
|----------------------|--------------|------------|--------------|------------|
| V600                 | 2            | 0          | 1            | 1          |
| Other                | 4            | 0          | 3            | 1          |
| Unknown              | 3            | 0          | 3            | 0          |
| KIT                  | 23/235 (10)  | 5/17 (29)  | 9/170 (5)    | 9/48 (19)  |
| NRAS                 | 54/264 (21)  | 2/18 (11)  | 47/191 (25)  | 5/55 (9)   |
| Q61R                 | 20           | 0          | 18           | 2          |
| Q61K                 | 8            | 0          | 8            | 0          |
| G12C/D/K/R/S         | 6            | 1          | 5            | 0          |
| Other                | 4            | 0          | 4            | 0          |
| Unknown              | 16           | 1          | 12           | 3          |
| BRAF/KIT both        | 1/234 (0.4)  | 0          | 0            | 1/47 (2)   |
| Other                | 23/93 (25)   | 0          | 14/64 (22)   | 9/24 (38)  |
| Wild Type            | 175/314 (56) | 11/20 (55) | 126/228 (55) | 33/66 (50) |
| Unknown/Not tested   | 11           | 2          | 6            | 3          |
| <b>ECOG- no. (%)</b> | <b>0.78</b>  |            |              |            |
| 0                    | 170 (52)     | 13 (59)    | 119 (51)     | 38 (55)    |
| ≥1                   | 110 (34)     | 6 (27)     | 79 (34)      | 25 (36)    |



|                                                                                                    |          |        |          |         |      |
|----------------------------------------------------------------------------------------------------|----------|--------|----------|---------|------|
| Unknown                                                                                            | 45 (37)  | 3 (14) | 36 (15)  | 6 (9)   |      |
| <b>LDH</b>                                                                                         |          |        |          |         | 0.37 |
| Normal ( $\leq$ ULN)                                                                               | 135 (42) | 12(55) | 93 (40)  | 30 (44) |      |
| Elevated ( $>$ ULN)                                                                                | 69 (21)  | 4 (18) | 54 (23)  | 11 (16) |      |
| Unknown                                                                                            | 121 (37) | 6 (27) | 87 (37)  | 28 (41) |      |
| <b>Stage (AJCC 8<sup>th</sup> ed)- no (%)</b>                                                      |          |        |          |         | 0.66 |
| Unresectable III                                                                                   | 79 (24)  | 3 (14) | 62 (26)  | 14 (20) |      |
| IV                                                                                                 | 246 (76) | 19(86) | 172 (74) | 55 (80) |      |
| M1a                                                                                                | 53 (16)  | 3(14)  | 39 (16)  | 11 (16) |      |
| M1b                                                                                                | 66 (21)  | 7(32)  | 40 (17)  | 19 (28) |      |
| M1c                                                                                                | 103 (32) | 7(32)  | 73 (31)  | 23 (34) |      |
| M1d                                                                                                | 24 (7)   | 2(9)   | 20 (9)   | 2 (2)   |      |
| <b>Number of treatment lines for<br/>advanced disease prior to 1<sup>st</sup><br/>CPI exposure</b> |          |        |          |         | 0.18 |
| 0                                                                                                  | 256 (79) | 15(68) | 181 (77) | 60 (87) |      |
| 1                                                                                                  | 62 (19)  | 6 (27) | 47 (20)  | 9 (13)  |      |

|                                                                 |            |            |            |            |      |
|-----------------------------------------------------------------|------------|------------|------------|------------|------|
| 2                                                               | 7 (2)      | 1 (5)      | 6 (3)      | 0          |      |
| De-novo metastatic disease-no (%)                               | 33 (10)    | 1 (5)      | 25 (11)    | 7 (10)     | 0.68 |
| Time from primary diagnosis to advanced disease, months [range] | 21 [0-261] | 27 [0-154] | 21 [0-246] | 18 [0-261] | 0.49 |

<sup>a</sup>Pearson’s Chi-squared test; Fisher’s exact test. <sup>b</sup>Non-Caucasian includes: East Asian, South East Asian, Middle Eastern, Hispanic and Black.

**Supplement 7:** Objective response rate (ORR) to 1<sup>st</sup> exposure CPI, by primary site. CR complete response; PR partial response; SD stable disease; PD progressive disease; OR odds ratio.

| N (%)         | Subungual (N=67) | Plantar (N=232) | Palmar (N=21) |
|---------------|------------------|-----------------|---------------|
| <b>ORR, %</b> | <b>19</b>        | <b>27</b>       | <b>43</b>     |
| <b>CR</b>     | 6 (9)            | 24 (10)         | 4 (19)        |
| <b>PR</b>     | 7 (10)           | 38 (16)         | 5 (24)        |
| <b>SD</b>     | 10 (15)          | 39 (17)         | 3 (14)        |
| <b>PD</b>     | 44 (66)          | 131 (57)        | 9 (43)        |

**Supplement 8:** Patient and disease characteristics for patients treated with 1<sup>st</sup> line CPI therapy. ECOG Eastern Cooperative Oncology Group; LDH lactate dehydrogenase.

| Patient and Disease Characteristic                                | Total      | Anti-PD1   | Anti-PD1 + Ipilimumab | Ipilimumab | P-value <sup>a</sup> |
|-------------------------------------------------------------------|------------|------------|-----------------------|------------|----------------------|
|                                                                   | (N=256)    | (N=151)    | (N=54)                | (N=51)     |                      |
| Primary site- no. (%)                                             |            |            |                       |            | 0.57                 |
| Palmar                                                            | 15 (6)     | 10 (7)     | 3 (6)                 | 2 (4)      |                      |
| Plantar                                                           | 181 (71)   | 111 (74)   | 36 (67)               | 34 (67)    |                      |
| Weight bearing                                                    | 109        | 63         | 24                    | 22         |                      |
| Non-weight bearing                                                | 36         | 23         | 8                     | 5          |                      |
| Subungual                                                         | 60 (23)    | 30 (20)    | 15 (28)               | 15 (29)    |                      |
| Toenail                                                           | 33         | 17         | 9                     | 7          |                      |
| Fingernail                                                        | 27         | 13         | 6                     | 8          |                      |
| Median age at diagnosis of primary acral melanoma, years [range]  | 65 [20-87] | 67 [30-87] | 61 [20-81]            | 63 [30-80] | 0.001                |
| Median age at diagnosis of advanced acral melanoma, years [range] | 68 [23-90] | 70 [31-90] | 64 [23-82]            | 65 [31-85] | 0.001                |
| Sex- no. (%)                                                      |            |            |                       |            | 0.80                 |

|                                                |             |             |            |           |
|------------------------------------------------|-------------|-------------|------------|-----------|
| Female                                         | 121 (47)    | 69 (46)     | 26 (48%)   | .326 (51) |
| Male                                           | 135 (53)    | 82 (54)     | 28 (52%)   | 25 (49)   |
| <b>Ethnicity- no. (%)</b>                      |             |             |            | 0.41      |
| Caucasian                                      | 208 (81)    | 121 (80)    | 43 (80)    | 44 (86)   |
| Non-Caucasian <sup>b</sup>                     | 40 (16)     | 27 (18)     | 8 (15)     | 5 (10)    |
| Unknown                                        | 8 (3)       | 3 (2)       | 3 (6)      | 2 (4)     |
| <b>Mutation- positive/tested (% of tested)</b> |             |             |            | 0.21      |
| BRAF                                           | 27/248 (11) | 16/148 (11) | 8/50 (16)  | 3/50 (6)  |
| V600E                                          | 21          | 11          | 7          | 3         |
| V600                                           | 1           | 1           | 0          | 0         |
| Other                                          | 3           | 3           | 1          | 0         |
| Unknown                                        | 1           | 1           | 0          | 0         |
| KIT                                            | 19/184 (10) | 15/112 (13) | 1/42 (2)   | 3/30 (10) |
| NRAS                                           | 43/210 (21) | 25/125 (20) | 10/45 (22) | 8/40 (20) |
| Q61R                                           | 17          | 10          | 4          | 3         |
| Q61K                                           | 6           | 5           | 0          | 1         |
| G12C/D/K/R/S                                   | 5           | 1           | 2          | 2         |

|                                                              |              |             |            |              |
|--------------------------------------------------------------|--------------|-------------|------------|--------------|
| Other                                                        | 4            | 1           | 2          | 1            |
| Unknown                                                      | 11           | 8           | 2          | 1            |
| BRAF/KIT both                                                | 1/184 (0.5)  | 1/112 (0.9) | 0          | 0            |
| Other                                                        | 22/84 (26)   | 13/50 (26)  | 7/24 (29)  | 2/10 (20)    |
| Wild Type                                                    | 136/248 (55) | 78/148 (53) | 24/50 (48) | 34/50 (68)   |
| Unknown/Not tested                                           | 8            | 3           | 4          | 1            |
| <b>ECOG at 1<sup>st</sup> line systemic therapy- no. (%)</b> |              |             |            | <b>0.02</b>  |
| 0                                                            | 139 (54)     | 85 (56)     | 24 (44)    | 30 (59)      |
| ≥1                                                           | 82 (32)      | 43 (29)     | 27 (50)    | 12 (24)      |
| Unknown                                                      | 35(14)       | 23 (15)     | 3 (6)      | 9 (18)       |
| <b>LDH at 1<sup>st</sup> line systemic therapy</b>           |              |             |            | <b>0.03</b>  |
| Normal (≤ULN)                                                | 98 (38)      | 65 (43)     | 17 (31.5%) | 16 (31)      |
| Elevated (>ULN)                                              | 50 (20)      | 23 (15)     | 18 (33.3%) | 9 (18)       |
| Unknown                                                      | 108 (42)     | 63 (42)     | 19 (35.2%) | 26 (51)      |
| <b>Stage (AJCC 8<sup>th</sup> ed)- no (%)</b>                |              |             |            | <b>0.003</b> |
| Unresectable III                                             | 71 (28)      | 51 (34)     | 9 (17)     | 11 (22)      |
| IV                                                           | 185 (72)     | 100 (66)    | 45 (83)    | 40 (78)      |

|                                                                        |                   |                   |                   |                   |                  |
|------------------------------------------------------------------------|-------------------|-------------------|-------------------|-------------------|------------------|
| M1a                                                                    | 41 (16)           | 25 (17)           | 6 (11)            | 10 (20)           |                  |
| M1b                                                                    | 49 (19)           | 34 (23)           | 6 (11)            | 9 (17)            |                  |
| M1c                                                                    | 79 (31)           | 35 (23)           | 24 (44)           | 20 (39)           |                  |
| M1d                                                                    | 16 (6)            | 6 (4)             | 9 (17)            | 1 (2)             |                  |
| <b>Treatment discontinuation reason</b>                                |                   |                   |                   |                   | <b>&lt;.0001</b> |
| Progressive Disease                                                    | 156 (61)          | 103 (68)          | 27 (50)           | 26 (51)           |                  |
| Toxicity                                                               | 43 (17)           | 15 (10)           | 22 (41)           | 6 (12)            |                  |
| Complete Response                                                      | 15 (6)            | 13 (9)            | 1 (2)             | 1 (2)             |                  |
| Completed therapy                                                      | 18 (7)            | 3 (2)             | 0                 | 15 (29)           |                  |
| Elective                                                               | 6 (2)             | 2 (1)             | 2 (4)             | 2 (4)             |                  |
| Other <sup>c</sup>                                                     | 7 (3)             | 5 (3)             | 1 (2)             | 1 (2)             |                  |
| Treatment ongoing                                                      | 11 (4)            | 10 (7)            | 1 (2)             | 0                 |                  |
| <b>De-novo metastatic disease- no (%)</b>                              | <b>24 (10)</b>    | <b>14 (10)</b>    | <b>7 (13)</b>     | <b>3 (6)</b>      | <b>0.48</b>      |
| <b>Time from primary diagnosis to advanced disease, months [range]</b> | <b>20 [0-261]</b> | <b>18 [0-261]</b> | <b>22 [0-131]</b> | <b>24 [0-193]</b> | <b>0.12</b>      |

<sup>a</sup>Pearson's Chi-squared test; Fisher's exact test. <sup>b</sup>Non-Caucasian includes East Asian, South East Asian, Middle Eastern, Hispanic and Black. <sup>c</sup>Other includes death, other medical condition.

**Supplement 9:** Efficacy of 1<sup>st</sup> line CPI therapy.

**Supplement 9a:** Objective response rate (ORR) to 1<sup>st</sup> line CPI therapy. CR complete response; PR partial response; SD stable disease; PD progressive disease.

| N (%)  | Anti-PD1 (N=149) | Anti-PD1 + Ipilimumab (N=54) | Ipilimumab (N=51) |
|--------|------------------|------------------------------|-------------------|
| ORR, % | 26               | 45                           | 12                |
| CR     | 19 (13)          | 8 (15)                       | 1 (2)             |
| PR     | 20 (13)          | 16 (30)                      | 5 (10)            |
| SD     | 25 (17)          | 7 (13)                       | 11 (22)           |
| PD     | 85 (57)          | 22 (42)                      | 34 (67)           |



**Supplement 9b:** Univariable and Multivariable Logistic regression for objective response rate (ORR) to 1<sup>st</sup> line CPI therapy, excluding 69 patients who received first line non-CPI therapy. OR odds ratio; CPI checkpoint inhibitor; LDH lactate dehydrogenase; ECOG Eastern Cooperative Oncology Group.

| Univariable               |                    |               | Multivariable     |               |
|---------------------------|--------------------|---------------|-------------------|---------------|
| Variable                  | OR (95% CI)        | P-value       | OR (95% CI)       | P-value       |
| 1 <sup>st</sup> line CPI  |                    |               |                   |               |
| Anti-PD1                  | 1                  |               | 1                 |               |
| Anti-PD1/ipilimumab       | 2.33 (1.22, 4.48)  | <b>0.0002</b> | 2.33 (1.20, 4.53) | <b>0.0002</b> |
| Ipilimumab                | 0.38 (0.15, 0.95)  | <b>0.0026</b> | 0.36 (0.14, 0.91) | <b>0.0019</b> |
| Stage of advanced disease |                    |               |                   |               |
| Unresectable IIIB         | 1                  |               |                   |               |
| Unresectable IIIC         | 3.03 (0.33, 27.84) | <b>0.024</b>  | -                 | -             |
| Unresectable IIID         | 2.50 (0.21, 29.25) | 0.32          | -                 | -             |
| M1a                       | 1.45 (0.15, 14.07) | 0.91          | -                 | -             |
| M1b                       | 1.15 (0.12, 11.12) | 0.64          | -                 | -             |
| M1c                       | 2.36 (0.26, 21.27) | 0.10          | -                 | -             |
| M1d                       | 0.33 (0.02, 6.37)  | 0.12          | -                 | -             |

|                             |                    |             |                   |             |
|-----------------------------|--------------------|-------------|-------------------|-------------|
| Primary acral melanoma site |                    |             |                   |             |
| Subungual                   | 1                  |             |                   |             |
| Plantar                     | 1.73 (0.83, 3.58)  | 0.59        | -                 | -           |
| Palmar                      | 4.36 (1.27, 15.01) | <b>0.03</b> | -                 | -           |
| Sex                         |                    |             |                   |             |
| Female                      | 1                  |             | 1                 |             |
| Male                        | 0.51 (0.29, 0.90)  | <b>0.02</b> | 0.49 (0.27, 0.87) | <b>0.02</b> |
| Ethnicity                   |                    |             |                   |             |
| Non-Caucasian               | 1                  |             |                   |             |
| Caucasian                   | 1.33 (0.59, 2.96)  | 0.49        | -                 | -           |
| LDH                         |                    |             |                   |             |
| Normal (≤ULN)               | 1                  |             |                   |             |
| Elevated (>ULN)             | 1.45 (0.69, 3.04)  | 0.32        | -                 | -           |
| ECOG                        |                    |             |                   |             |
| 0                           | 1                  |             |                   |             |
| ≥1                          | 0.72 (0.38, 1.35)  | 0.31        | -                 | -           |

**Supplement 10:** progression free survival (PFS) and overall survival (OS) the 1<sup>st</sup> line CPI therapy.

Of the total cohort of 325 patients, 256 (79%) received 1<sup>st</sup> line CPI: anti-PD1 monotherapy in 151 (46%) patients, anti-PD1/ipilimumab combination in 54 (17%) patients and ipilimumab in 51 (16%) patients. The most common non-CPI 1<sup>st</sup> line treatment was chemotherapy (43/69 patients, 62%); others treatments included BRAK/MEK inhibitors, cKIT inhibitors, interleukin, intra-tumoural therapies and electrochemotherapy (**Supplement 6**).

**Supplement 10a:** Kaplan-Meier curve for progression free survival (PFS) to 1<sup>st</sup> line CPI therapy (p=0.017).

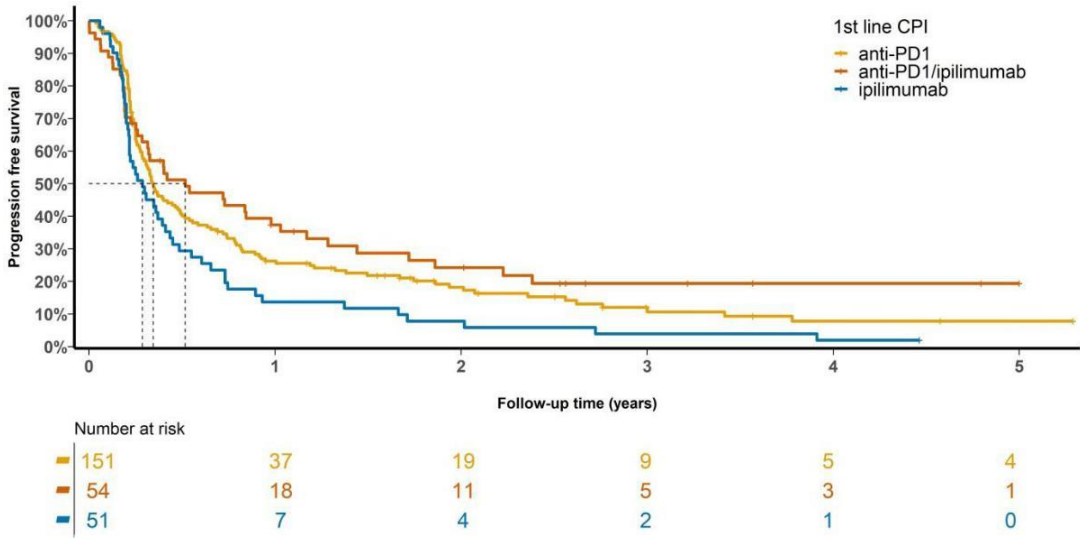

**Supplement 10b:** Univariable and Multivariable Cox regression for progression free survival (PFS) to 1<sup>st</sup> line CPI therapy. HR hazard ratio; CPI checkpoint inhibitor; LDH lactate dehydrogenase; ECOG Eastern Cooperative Oncology Group.

|                           | Univariable       |             | Multivariable     |             |
|---------------------------|-------------------|-------------|-------------------|-------------|
| Variable                  | HR (95% CI)       | P-value     | HR (95% CI)       | P-value     |
| 1 <sup>st</sup> line CPI  |                   |             |                   |             |
| Anti-PD1                  | 1                 |             | 1                 |             |
| Anti-PD1/ipilimumab       | 0.81 (0.57, 1.15) | 0.23        | 0.78 (0.53, 1.13) | 0.19        |
| Ipilimumab                | 1.43 (1.03, 1.99) | <b>0.03</b> | 1.58 (1.09, 2.29) | <b>0.02</b> |
| Stage of advanced disease |                   |             |                   |             |
| Unresectable IIIB         | 1                 |             | 1                 |             |
| Unresectable IIIC         | 0.69 (0.27, 1.75) | 0.43        | 0.73 (0.29, 1.88) | 0.52        |
| Unresectable IIID         | 0.89 (0.31, 2.53) | 0.82        | 1.02 (0.35, 2.94) | 0.98        |
| M1a                       | 1.14 (0.45, 2.92) | 0.78        | 1.21 (0.47, 3.13) | 0.69        |
| M1b                       | 0.98 (0.39, 2.48) | 0.97        | 1.07 (0.42, 2.76) | 0.88        |
| M1c                       | 0.87 (0.35, 2.17) | 0.77        | 0.84 (0.33, 2.11) | 0.71        |
| M1d                       | 3.32 (1.21, 9.10) | <b>0.02</b> | 3.30 (1.17, 9.27) | <b>0.02</b> |

|                             |                   |      |                   |      |
|-----------------------------|-------------------|------|-------------------|------|
| Primary acral melanoma site |                   |      |                   |      |
| Subungual                   | 1                 |      |                   |      |
| Plantar                     | 0.71 (0.52, 0.96) | 0.03 | -                 | -    |
| Palmar                      | 0.58 (0.29, 1.13) | 0.11 | -                 | -    |
| Sex                         |                   |      |                   |      |
| Female                      | 1                 |      |                   |      |
| Male                        | 1.11 (0.85, 1.44) | 0.46 | -                 | -    |
| Ethnicity                   |                   |      |                   |      |
| Non-Caucasian               | 1                 |      |                   |      |
| Caucasian                   | 0.99 (0.68, 1.44) | 0.94 | -                 | -    |
| LDH                         |                   |      |                   |      |
| Normal (≤ULN)               | 1                 |      |                   |      |
| Elevated (>ULN)             | 1.09 (0.75, 1.58) | 0.65 | -                 | -    |
| ECOG                        |                   |      |                   |      |
| 0                           | 1                 |      | 1                 |      |
| ≥1                          | 1.36 (1.01, 1.83) | 0.04 | 1.33 (0.98, 1.80) | 0.07 |

**Supplement 10c:** Kaplan-Meier curve for overall survival (OS) to 1<sup>st</sup> line CPI therapy (p=0.68).

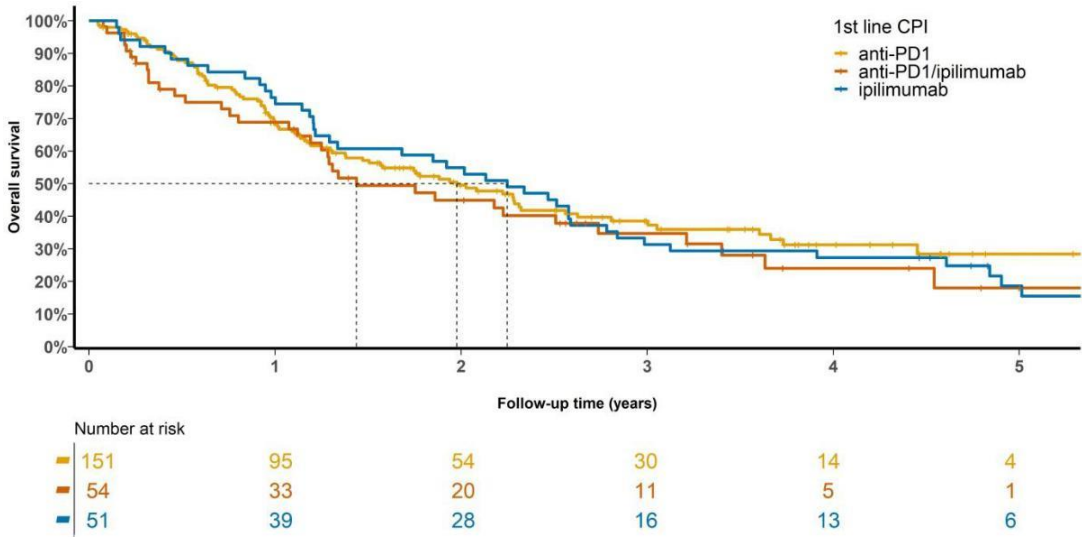

**Supplement 10d:** Univariable and Multivariable Cox regression for overall survival (OS) to 1<sup>st</sup> line CPI therapy. HR hazard ratio; CPI checkpoint inhibitor; LDH lactate dehydrogenase; ECOG Eastern Cooperative Oncology Group.

| Univariable                        |                    |             | Multivariable     |         |
|------------------------------------|--------------------|-------------|-------------------|---------|
| Variable                           | HR (95% CI)        | P-value     | HR (95% CI)       | P-value |
| <b>1<sup>st</sup> line CPI</b>     |                    |             |                   |         |
| Anti-PD1                           | 1                  |             |                   |         |
| Anti-PD1/ipilimumab                | 1.19 (0.80, 1.76)  | 0.38        | -                 | -       |
| Ipilimumab                         | 1.03 (0.71, 1.50)  | 0.87        | -                 | -       |
| <b>Stage of advanced disease</b>   |                    |             |                   |         |
| Unresectable IIIB                  | 1                  |             | 1                 |         |
| Unresectable IIIC                  | 0.59 (0.21, 1.68)  | 0.32        | 0.48 (0.16, 1.40) | 0.18    |
| Unresectable IIID                  | 0.66 (0.20, 2.20)  | 0.50        | 0.57 (0.16, 1.94) | 0.36    |
| M1a                                | 0.79 (0.27, 2.30)  | 0.67        | 0.78 (0.27, 2.29) | 0.65    |
| M1b                                | 0.96 (0.34, 2.70)  | 0.93        | 0.91 (0.32, 2.60) | 0.86    |
| M1c                                | 0.98 (0.35, 2.71)  | 0.97        | 0.77 (0.27, 2.16) | 0.62    |
| M1d                                | 4.24 (1.41, 12.72) | <b>0.01</b> | 2.33 (0.74, 7.35) | 0.15    |
| <b>Primary acral melanoma site</b> |                    |             |                   |         |



|                 |                   |        |                   |        |
|-----------------|-------------------|--------|-------------------|--------|
| Subungual       | 1                 |        |                   |        |
| Plantar         | 0.79 (0.56, 1.12) | 0.19   | -                 | -      |
| Palmar          | 0.60 (0.27, 1.34) | 0.22   | -                 | -      |
| Sex             |                   |        |                   |        |
| Female          | 1                 |        |                   |        |
| Male            | 1.22 (0.89, 1.66) | 0.22   | -                 | -      |
| Ethnicity       |                   |        |                   |        |
| Non-Caucasian   | 1                 |        |                   |        |
| Caucasian       | 0.96 (0.63, 1.46) | 0.85   | -                 | -      |
| LDH             |                   |        |                   |        |
| Normal (≤ULN)   | 1                 |        |                   |        |
| Elevated (>ULN) | 1.09 (0.71, 1.67) | 0.69   | -                 | -      |
| ECOG            |                   |        |                   |        |
| 0               | 1                 |        | 1                 |        |
| ≥1              | 2.31 (1.64, 3.25) | <.0001 | 1.99 (1.37, 2.90) | 0.0003 |

**Supplement 11:** Patient and disease characteristics of total population, and by 1<sup>st</sup> CPI exposure (anti-PD1 vs anti-PD1/ipilimumab), before and after propensity score matching.

| Characteristics                                                     | Before matching       |                            |             | After matching       |                            |             |
|---------------------------------------------------------------------|-----------------------|----------------------------|-------------|----------------------|----------------------------|-------------|
|                                                                     | Anti-                 |                            | P-<br>value | Anti-                |                            | P-<br>value |
|                                                                     | Anti-PD1<br>(N = 184) | PD1/Ipilimumab<br>(N = 59) |             | Anti-PD1<br>(N = 51) | PD1/Ipilimumab<br>(N = 51) |             |
| Primary site- no. (%)                                               |                       |                            |             |                      |                            |             |
| Sole of foot                                                        | 138 (75.0%)           | 41 (69.5%)                 | 0.42        | 39(76.5%)            | 34 (66.7%)                 | 0.18        |
| Palm of hand                                                        | 13 (7.1%)             | 3 (5.1%)                   |             | 5(9.8%)              | 3 (5.9%)                   |             |
| Nail apparatus (subungual)                                          | 33 (17.9%)            | 15 (25.4%)                 |             | 7 (13.7%)            | 14 (27.5%)                 |             |
| Median age at diagnosis of primary acral melanoma years<br>[range]  | 65(29, 88)            | 60.20(20, 81)              | 0.02        | 64(34, 83)           | 60.20(20, 81)              | 0.31        |
| Median age at diagnosis of advanced acral melanoma years<br>[range] | 69(31, 90)            | 64(23, 82)                 | 0.01        | 67(36, 86)           | 64(23, 82)                 | 0.19        |
| Sex- no. (%)                                                        |                       |                            |             |                      |                            |             |
| Female                                                              | 82 (44.6%)            | 29 (49.2%)                 | 0.54        | 19(37.3%)            | 23 (45.1%)                 | 0.42        |

| Characteristics                                                      | Before matching       |                            |             | After matching       |                            |             |
|----------------------------------------------------------------------|-----------------------|----------------------------|-------------|----------------------|----------------------------|-------------|
|                                                                      | Anti-                 |                            | P-<br>value | Anti-                |                            | P-<br>value |
|                                                                      | Anti-PD1<br>(N = 184) | PD1/Ipilimumab<br>(N = 59) |             | Anti-PD1<br>(N = 51) | PD1/Ipilimumab<br>(N = 51) |             |
| Male                                                                 | 102 (55.4%)           | 30 (50.8%)                 |             | 32 (62.7%)           | 28 (54.9%)                 |             |
| Ethnicity- no. (%)                                                   |                       |                            |             |                      |                            |             |
| Non-Caucasian                                                        | 50 (27.6%)            | 9 (16.4%)                  | 0.09        | 11 (21.6%)           | 7 (14.6%)                  | 0.37        |
| Caucasian                                                            | 131 (72.4%)           | 46 (83.6%)                 |             | 40 (78.4%)           | 41 (85.4%)                 |             |
| ECOG at 1st line systemic therapy- no. (%)                           |                       |                            |             |                      |                            |             |
| 0                                                                    | 99 (62.7%)            | 27 (49.1%)                 | 0.08        | 29 (65.9%)           | 24 (50.0%)                 | 0.12        |
| ≥1                                                                   | 59 (37.3%)            | 28 (50.9%)                 |             | 15 (34.1%)           | 24 (50.0%)                 |             |
| LDH at 1st line systemic therapy <sup>a</sup>                        |                       |                            |             |                      |                            |             |
| Normal                                                               | 86 (73.5%)            | 19 (48.7%)                 | 0.004       | 17 (56.7%)           | 17 (53.1%)                 | 0.78        |
| Elevated                                                             | 31 (26.5%)            | 20 (51.3%)                 |             | 13 (43.3%)           | 15 (46.9%)                 |             |
| Melanoma stage at treatment start (AJCC 8th ed)- no (%) <sup>a</sup> |                       |                            |             |                      |                            |             |
| Unresectable IIIB                                                    | 5 (2.7%)              | 0 (0.0%)                   | <.0001      | 8 (15.7%)            | 8 (15.7%)                  | 0.71        |

| Characteristics                    | Before matching       |                            |             | After matching       |                            |             |
|------------------------------------|-----------------------|----------------------------|-------------|----------------------|----------------------------|-------------|
|                                    | Anti-                 |                            | P-<br>value | Anti-                |                            | P-<br>value |
|                                    | Anti-PD1<br>(N = 184) | PD1/Ipilimumab<br>(N = 59) |             | Anti-PD1<br>(N = 51) | PD1/Ipilimumab<br>(N = 51) |             |
| Unresectable IIIC                  | 42 (22.8%)            | 9 (15.3%)                  |             | 1 (2.0%)             | 1 (2.0%)                   |             |
| Unresectable IIID                  | 10 (5.4%)             | 1 (1.7%)                   |             | 5 (9.8%)             | 6 (11.8%)                  |             |
| M1a                                | 33 (17.9%)            | 6 (10.2%)                  |             | 7 (13.7%)            | 6 (11.8%)                  |             |
| M1b                                | 43 (23.4%)            | 6 (10.2%)                  |             | 27 (52.9%)           | 22 (43.1%)                 |             |
| M1c                                | 45 (24.5%)            | 25 (42.4%)                 |             | 3 (5.9%)             | 8 (15.7%)                  |             |
| M1d                                | 6 (3.3%)              | 12 (20.3%)                 |             | 3 (5.9%)             | 8 (15.7%)                  |             |
| BRAF mutation <sup>a</sup>         |                       |                            |             |                      |                            |             |
| No                                 | 163 (88.6%)           | 49 (83.1%)                 | 0.27        | 42 (82.4%)           | 43 (84.3%)                 | 0.79        |
| Yes                                | 21 (11.4%)            | 10 (16.9%)                 |             | 9 (17.6%)            | 8 (15.7%)                  |             |
| De-novo metastatic disease- no (%) |                       |                            |             |                      |                            |             |
| No                                 | 161 (89.0%)           | 52 (88.1%)                 | 0.86        | 46 (90.2%)           | 44 (86.3%)                 | 0.54        |
| Yes                                | 20 (11.0%)            | 7 (11.9%)                  |             | 5 (9.8%)             | 7 (13.7%)                  |             |

| Characteristics                                                          | Before matching        |                            |             | After matching       |                            |             |
|--------------------------------------------------------------------------|------------------------|----------------------------|-------------|----------------------|----------------------------|-------------|
|                                                                          | Anti-                  |                            |             | Anti-                |                            |             |
|                                                                          | Anti-PD1<br>(N = 184)  | PD1/Ipilimumab<br>(N = 59) | P-<br>value | Anti-PD1<br>(N = 51) | PD1/Ipilimumab<br>(N = 51) | P-<br>value |
| Treatment discontinuation reason                                         |                        |                            |             |                      |                            |             |
| Progression                                                              | 126 (68.5%)            | 32 (54.2%)                 | <.0001      | 35 (68.6%)           | 25 (49.0%)                 | 0.01        |
| Toxicity                                                                 | 17 (9.2%)              | 22 (37.3%)                 |             | 7 (13.7%)            | 21 (41.2%)                 |             |
| Rx ongoing                                                               | 10 (5.4%)              | 1 (1.7%)                   |             | 1 (2.0%)             | 1 (2.0%)                   |             |
| Completed Rx                                                             | 7 (3.8%)               | 0 (0.0%)                   |             | 1 (2.0%)             | 0 (0.0%)                   |             |
| Elective                                                                 | 3 (1.6%)               | 2 (3.4%)                   |             | 1 (2.0%)             | 2 (3.9%)                   |             |
| Other, specify                                                           | 7 (3.8%)               | 1 (1.7%)                   |             | 1 (2.0%)             | 1 (2.0%)                   |             |
| CR                                                                       | 14 (7.6%)              | 1 (1.7%)                   |             | 5 (9.8%)             | 1 (2.0%)                   |             |
| Median time from primary diagnosis to advanced disease<br>months [range] | 18.4 (-0.13,<br>260.6) | 22.8 (0.0, 131.3)          | 0.81        | 19.7 (0.0,<br>204.7) | 21.3 (0.0, 131.3)          | 0.44        |

<sup>a</sup>indicates variable is included in the matching process.

**Supplement 12:** Univariate Logistic Regression of Objective Response Rate, after propensity score matching.

| Univariate                         |                    |         |
|------------------------------------|--------------------|---------|
| Variable                           | OR (95% CI)        | P-value |
| <b>1st CPI exposure</b>            |                    |         |
| Anti-PD1                           | 1                  |         |
| Anti-PD1/ipilimumab                | 2.30 (0.99, 5.33)  | 0.05    |
| <b>Primary acral melanoma site</b> |                    |         |
| Subungual                          | 1                  |         |
| Palmar                             | 5.67 (0.89, 36.08) | 0.16    |
| Plantar                            | 3.53 (0.95, 13.13) | 0.46    |
| <b>Sex</b>                         |                    |         |
| Female                             | 1                  |         |
| Male                               | 0.45 (0.20, 1.04)  | 0.06    |
| <b>Ethnicity</b>                   |                    |         |
| Non-Caucasian                      | 1                  |         |
| Caucasian                          | 1.32 (0.43, 4.10)  | 0.62    |
| <b>Stage of advanced disease</b>   |                    |         |
| Unresectable IIIC                  | 1                  |         |
| Unresectable IIID                  | 0.60 (0.03, 11.47) | 0.55    |
| M1a                                | 0.23 (0.04, 1.19)  | 0.68    |
| M1b                                | 0.27 (0.06, 1.26)  | 0.87    |
| M1c                                | 0.30 (0.09, 0.97)  | 0.96    |
| M1d                                | 0.06 (0.01, 0.59)  | 0.09    |
| <b>LDH</b>                         |                    |         |

| Univariate |                   |         |
|------------|-------------------|---------|
| Variable   | OR (95% CI)       | P-value |
| Normal     | 1                 |         |
| Elevated   | 1.20 (0.40, 3.56) | 0.74    |
| ECOG       |                   |         |
| 0          | 1                 |         |
| >=1        | 0.38 (0.14, 0.97) | 0.04    |

**Supplement 13:** Progression free survival (PFS), after propensity score matching.

**Supplement 13a:** Kaplan-Meier curve for progression free survival (PFS) by 1<sup>st</sup> CPI exposure as anti-PD1 vs anti-PD1/ipilimumab after propensity score matching (p = 0.36). Landmark PFS for anti-PD1/ipilimumab vs anti-PD1 at 1 year: 36% (95% CI 24-52) vs 27% (95% CI 17-43); 2 years: 24% (95% CI 14-40) vs 16% (95% CI 8-31).

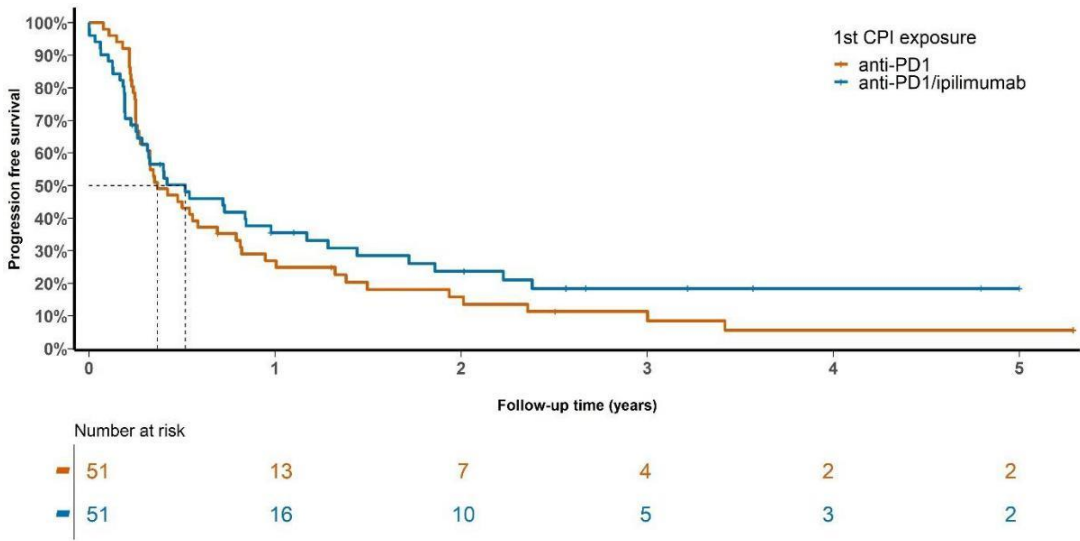



**Supplement 13b:** Univariable and Multivariable Cox regression of progression free survival (after propensity score matching).

| Variable                    | Univariate         |                  | Multivariable      |                  |
|-----------------------------|--------------------|------------------|--------------------|------------------|
|                             | HR (95% CI)        | P-value          | HR (95% CI)        | P-value          |
| 1st CPI exposure            |                    |                  |                    |                  |
| Anti-PD1                    | 1                  |                  |                    |                  |
| Anti-PD1/ipilimumab         | 0.82 (0.53, 1.26)  | 0.36             |                    |                  |
| Stage of advanced disease   |                    |                  |                    |                  |
| Unresectable IIIC           | 1                  |                  | 1                  |                  |
| Unresectable IIID           | 2.39 (0.53, 10.80) | 0.26             | 3.24 (0.68, 15.54) | 0.14             |
| M1a                         | 2.52 (1.10, 5.75)  | <b>0.03</b>      | 2.95 (1.16, 7.48)  | <b>0.02</b>      |
| M1b                         | 1.27 (0.56, 2.89)  | 0.56             | 1.69 (0.68, 4.23)  | 0.26             |
| M1c                         | 1.46 (0.76, 2.81)  | 0.25             | 1.62 (0.78, 3.37)  | 0.20             |
| M1d                         | 8.34 (3.54, 19.63) | <b>&lt;.0001</b> | 6.70 (2.60, 17.28) | <b>&lt;.0001</b> |
| Primary acral melanoma site |                    |                  |                    |                  |
| Subungual                   | 1                  |                  |                    |                  |

| Variable      | Univariate        |              | Multivariable     |             |
|---------------|-------------------|--------------|-------------------|-------------|
|               | HR (95% CI)       | P-value      | HR (95% CI)       | P-value     |
| Palmar        | 0.52 (0.19, 1.38) | 0.19         |                   |             |
| Plantar       | 0.59 (0.35, 0.99) | <b>0.05</b>  |                   |             |
| Sex           |                   |              |                   |             |
| Female        | 1                 |              |                   |             |
| Male          | 0.96 (0.63, 1.49) | 0.87         |                   |             |
| Ethnicity     |                   |              |                   |             |
| Non-Caucasian | 1                 |              |                   |             |
| Caucasian     | 1.26 (0.70, 2.28) | 0.45         |                   |             |
| LDH           |                   |              |                   |             |
| Normal        | 1                 |              |                   |             |
| Elevated      | 1.06 (0.61, 1.83) | 0.84         |                   |             |
| ECOG          |                   |              |                   |             |
| 0             | 1                 |              | 1                 |             |
| >=1           | 1.91 (1.20, 3.02) | <b>0.006</b> | 1.67 (1.01, 2.78) | <b>0.05</b> |

**Supplement 14:** Overall survival (OS), after propensity score matching.

**Supplement 14a:** Kaplan-Meier curve for overall survival (OS) by 1<sup>st</sup> CPI exposure as anti-PD1 vs anti-PD1/ipilimumab after propensity score matching (p = 0.32). Landmark OS for anti-PD1/ipilimumab vs anti-PD1 at 1 year: 69% (95% CI 57-83) vs 73% (95% CI 62-87); 2 years: 43% (95% CI 31-61) vs 57% (95% CI 45-74).

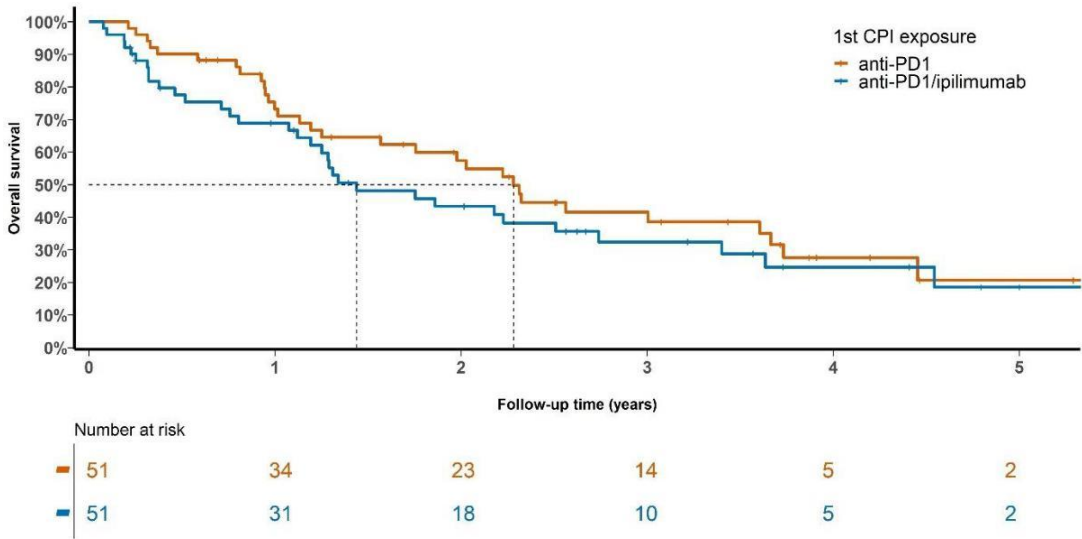

**Supplement 14b:** Univariable and Multivariable Cox regression of overall survival, after propensity score matching.

|                                    | Univariable       |              | Multivariable     |                  |
|------------------------------------|-------------------|--------------|-------------------|------------------|
| Variable                           | HR                | P-value      | HR (95% CI)       | P-value          |
| <b>1st CPI exposure</b>            |                   |              |                   |                  |
| Anti-PD1                           | 1                 |              |                   |                  |
| Anti-PD1/ipilimumab                | 1.28 (0.78, 2.10) | 0.32         |                   |                  |
| <b>Primary acral melanoma site</b> |                   |              |                   |                  |
| Subungual                          | 1                 |              | 1                 |                  |
| Palmar                             | 0.29 (0.08, 0.99) | <b>0.05</b>  | 0.15 (0.03, 0.80) | <b>0.03</b>      |
| Plantar                            | 0.40 (0.22, 0.71) | <b>0.002</b> | 0.25 (0.13, 0.49) | <b>&lt;.0001</b> |
| <b>Sex</b>                         |                   |              |                   |                  |
| Female                             | 1                 |              |                   |                  |
| Male                               | 1.24 (0.74, 2.08) | 0.42         |                   |                  |
| <b>Ethnicity</b>                   |                   |              |                   |                  |
| Non-Caucasian                      | 1                 |              |                   |                  |
| Caucasian                          | 1.19 (0.62, 2.29) | 0.60         |                   |                  |

|                           | Univariable        |               | Multivariable      |               |
|---------------------------|--------------------|---------------|--------------------|---------------|
| Variable                  | HR                 | P-value       | HR (95% CI)        | P-value       |
| Stage of advanced disease |                    |               |                    |               |
| Unresectable IIIC         | 1                  |               | 1                  |               |
| Unresectable IIID         | 0.80 (0.10, 6.29)  | 0.83          | 2.13 (0.21, 21.45) | 0.52          |
| M1a                       | 1.66 (0.62, 4.48)  | 0.32          | 3.23 (1.05, 9.95)  | <b>0.04</b>   |
| M1b                       | 0.81 (0.29, 2.27)  | 0.69          | 0.79 (0.26, 2.43)  | 0.68          |
| M1c                       | 1.51 (0.71, 3.19)  | 0.28          | 1.79 (0.78, 4.14)  | 0.17          |
| M1d                       | 5.32 (2.19, 12.95) | <b>0.0002</b> | 6.17 (2.14, 17.83) | <b>0.0008</b> |
| LDH                       |                    |               |                    |               |
| Normal                    | 1                  |               |                    |               |
| Elevated                  | 1.37 (0.73, 2.55)  | 0.3230        |                    |               |
| ECOG                      |                    |               |                    |               |
| 0                         | 1                  |               | 1                  |               |
| >=1                       | 2.40 (1.41, 4.08)  | <b>0.001</b>  | 1.56 (0.85, 2.87)  | 0.16          |

Supplement 15: BRAF mutant subgroup.

Supplement 15a: Objective response rate (ORR) to 1<sup>st</sup> line CPI or BRAF/MEK inhibitor therapy in BRAF mutant patients (N=38)

| N (%)  | Anti-PD1 (N=16) | Anti-PD1 + ipilimumab (N=8) | Ipilimumab (N=3) | Targeted therapy (N=9) |
|--------|-----------------|-----------------------------|------------------|------------------------|
| ORR, % | 31              | 63                          | 67               | 67                     |
| CR     | 4               | 4                           | 0                | 1                      |
| PR     | 1               | 1                           | 2                | 5                      |
| SD     | 2               | 2                           | 1                | 1                      |
| PD     | 9               | 1                           | 0                | 2                      |

**Supplement 15b:** Univariable Logistic regression for objective response rate (ORR) to 1<sup>st</sup> line CPI or targeted therapy in BRAF mutation patients (N=38).

|                                    | OR (95% CI)        | P-value |
|------------------------------------|--------------------|---------|
| <b>1<sup>st</sup> line CPI</b>     |                    |         |
| Anti-PD1                           | 1                  |         |
| Anti-PD1/ipilimumab                | 3.67 (0.62, 21.73) | 0.73    |
| Ipilimumab                         | 4.40 (0.32, 60.61) | 0.67    |
| Targeted therapy                   | 4.40 (0.77, 25.15) | 0.52    |
| <b>Primary acral melanoma site</b> |                    |         |
| Subungual                          | 1                  |         |
| Palmar                             | NA                 | 0.97    |
| Plantar                            | 0.88 (0.11, 7.05)  | 0.97    |
| <b>Sex</b>                         |                    |         |
| Female                             | 1                  |         |
| Male                               | 0.79 (0.20, 3.07)  | 0.73    |
| <b>Ethnicity</b>                   |                    |         |
| Non-Caucasian                      | 1                  |         |
| Caucasian                          | 1.50 (0.22, 10.30) | 0.68    |

|                           |                    |      |
|---------------------------|--------------------|------|
| Stage of advanced disease |                    |      |
| Unresectable IIIC         | 1                  |      |
| Unresectable IIID         | NA                 | 0.97 |
| M1a                       | 1.00 (0.13, 7.57)  | 0.97 |
| M1b                       | 3.00 (0.19, 47.96) | 0.95 |
| M1c                       | 0.83 (0.11, 6.11)  | 0.97 |
| M1d                       | 1.00 (0.08, 12.56) | 0.97 |
| LDH                       |                    |      |
| Normal (≤ULN)             | 1                  |      |
| Elevated (>ULN)           | 0.13 (0.01, 1.38)  | 0.09 |
| ECOG                      |                    |      |
| 0                         | 1                  |      |
| ≥1                        | 0.62 (0.15, 2.58)  | 0.51 |



**Supplement 15c:** Kaplan-Meier curve for progression free survival (PFS) in BRAF mutant patients (N=38).

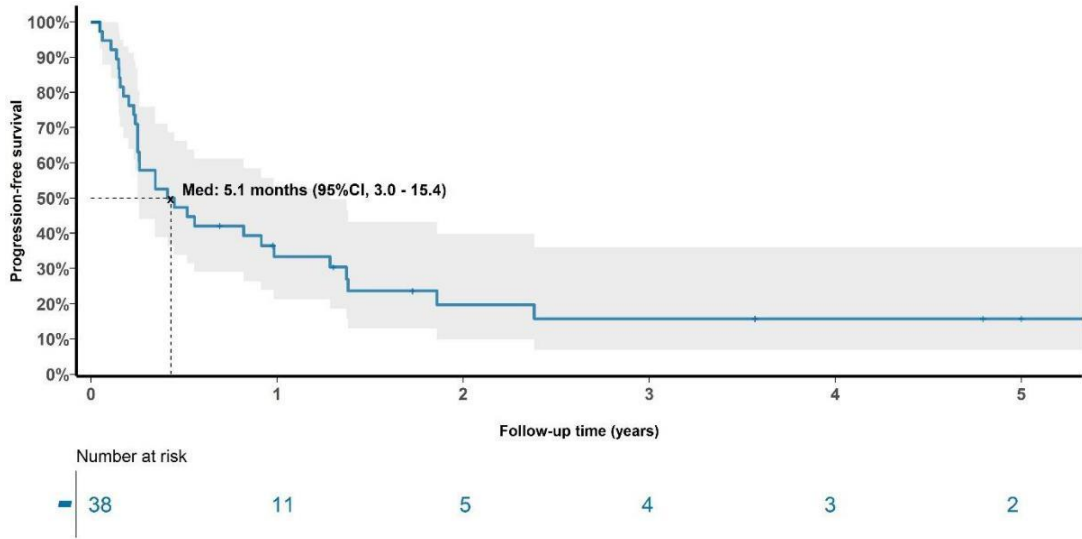

**Supplement 15d:** Kaplan-Meier curve for overall survival (OS) in BRAF mutant patients (N=38).

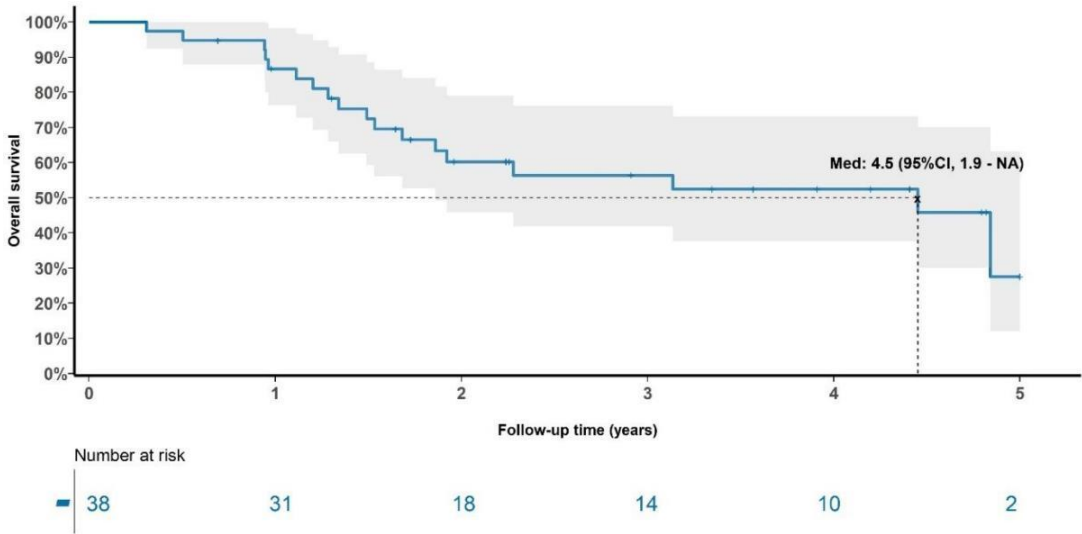

Supplement: inline-supplementary-material-1 [file inline-supplementary-material-1.pdf]
